# Supplementary material for: Porous carbon-coated NaTi2(PO4)3 with superior rate and low-temperature properties
Source: Royal Society of Chemistry journal article supplement (doi:10.1039/c7ta10207k), 2018-01-01
Supplement: c7ta10207k1.pdf [file c7ta10207k1.pdf]

# Supporting Information

## Porous carbon-coated $\text{NaTi}_2(\text{PO}_4)_3$ with superior rate and low-temperature properties

Qiao Hu<sup>a</sup>, Mu-Fan Yu<sup>a</sup>, Jia-Ying Liao<sup>a</sup>, Zhao-Yin Wen<sup>b</sup>, Chun-Hua Chen<sup>a,\*</sup>

- a. *CAS Key Laboratory of Materials for Energy Conversions, Department of Materials Science and Engineering & Collaborative Innovation Center of Suzhou Nano Science and Technology, University of Science and Technology of China, Anhui Hefei 230026, China*
- b. *Shanghai Institute of Ceramics, Chinese Academy of Sciences, Shanghai 200050, China*

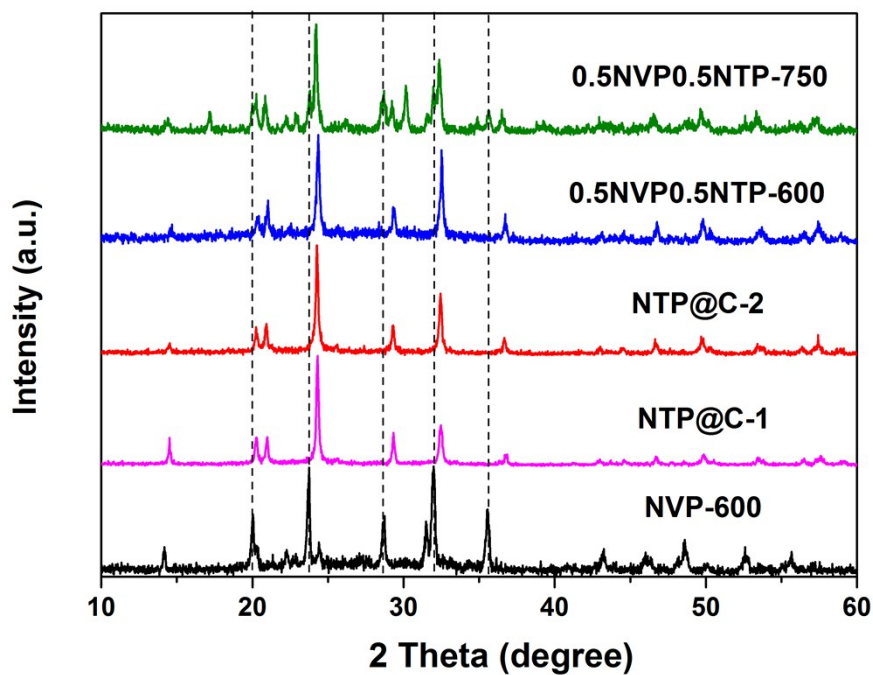

**Fig. S1** XRD patterns of NVP-600, NTP@C-1, NTP@C-2, 0.5NVP0.5NTP-600 and 0.5NVP0.5NTP-750. The dash-lines indicates the positions of the main diffraction peaks of Na<sub>3</sub>V<sub>2</sub>(PO<sub>4</sub>)<sub>3</sub>.
